# Supplementary material for: Ceritinib-Induced Regression of an Insulin-Like Growth Factor-Driven Neuroepithelial Brain Tumor
Source: MDPI journal article supplement (doi:10.3390/ijms20174267), 2019-08-30
Supplement: s1 [file s1]

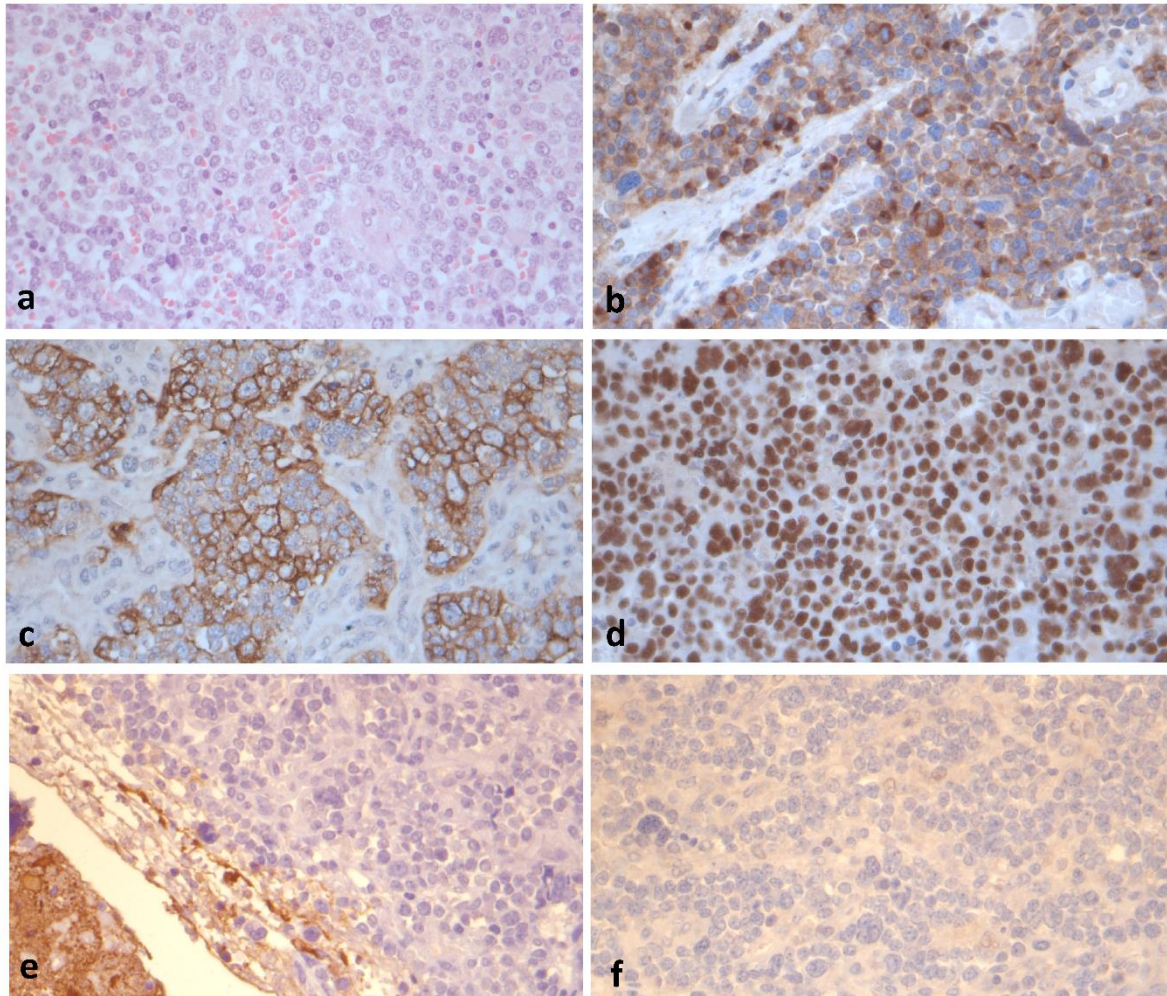

**Figure S1. Histopathological features of the relapse.** H&E staining shows an undifferentiated cellular tumor lacking characteristic growth patterns (a). Most tumor cells were positive for EMA, sometimes displaying a dot-like positivity (b). Tumor cells further showed L1CAM-positivity (c). Nuclear INI1 expression was retained (d). GFAP (e) and IDH1 R132H (f) were not expressed. Magnification 400X.
