# Supplementary material for: Ceritinib-Induced Regression of an Insulin-Like Growth Factor-Driven Neuroepithelial Brain Tumor
Source: MDPI journal article supplement (doi:10.3390/ijms20174267), 2019-08-30
Supplement: s1 [file s1]

**Table S1.** Transcripts of the Notch pathway deregulated in the first relapse.

| Symbol        | Entrez Gene Name                                             | TPM normal | TPM tumor | Exp Fold Change | Expected | Location            | Type(s)                 |
|---------------|--------------------------------------------------------------|------------|-----------|-----------------|----------|---------------------|-------------------------|
| <i>CNTN1</i>  | contactin 1                                                  | 199        | 1         | -199            | Up       | Plasma Membrane     | enzyme                  |
| <i>DLL1</i>   | delta like canonical Notch ligand 1                          | 5          | 238       | 48              | Up       | Plasma Membrane     | enzyme                  |
| <i>DLL3</i>   | delta like canonical Notch ligand 3                          | 5          | 105       | 21              | Up       | Extracellular Space | other                   |
| <i>DTX4</i>   | deltex E3 ubiquitin ligase 4                                 | 31         | 2         | -15             |          | Cytoplasm           | enzyme                  |
| <i>HES1</i>   | hes family bHLH transcription factor 1                       | 11         | 160       | 14              |          | Nucleus             | transcription regulator |
| <i>HES7</i>   | hes family bHLH transcription factor 7                       | 1          | 58        | 58              |          | Nucleus             | transcription regulator |
| <i>JAG1</i>   | jagged 1                                                     | 9          | 95        | 11              | Up       | Extracellular Space | growth factor           |
| <i>LFNG</i>   | LFNG O-fucosylpeptide 3-beta-N-acetylglucosaminyltransferase | 10         | 741       | 74              | Down     | Cytoplasm           | enzyme                  |
| <i>MAG</i>    | myelin associated glycoprotein                               |            |           | -440.212        |          | Plasma Membrane     | other                   |
| <i>NOTCH1</i> | notch 1                                                      | 7          | 183       | 26              | Up       | Plasma Membrane     | transcription regulator |
| <i>NUMBL</i>  | NUMB like, endocytic adaptor protein                         | 50         | 4         | -12             | Down     | Cytoplasm           | other                   |

The Exp fold change indicates the ratio between the TPMs of the first relapse (TPM tumor) and of the normal brain (TPM normal, sample 111). If known, the expected status (up regulated or down regulated) if the pathway is activate is indicated. The location and function (Type) of the corresponding proteins are also indicated.

**Table S2.** Transcripts of the BBC pathway deregulated in the first relapse. See supplementary Table 1 for legend.

| Symbol        | Entrez Gene Name                      | TPM<br>normal | TPM<br>tumor | Exp<br>Fold<br>Change | Expected | Location            | Type(s)                    |
|---------------|---------------------------------------|---------------|--------------|-----------------------|----------|---------------------|----------------------------|
| <i>APC2</i>   | APC2, WNT signaling pathway regulator | 33            | 1            | -33                   |          | Cytoplasm           | enzyme                     |
| <i>BMP4</i>   | bone morphogenetic protein 4          | 2             | 26           | 13                    | Up       | Extracellular Space | growth factor              |
| <i>BMP8B</i>  | bone morphogenetic protein 8b         | 2             | 96           | 48                    | Up       | Extracellular Space | growth factor              |
| <i>FZD10</i>  | frizzled class receptor 10            | 1             | 31           | 31                    | Up       | Plasma Membrane     | G-protein coupled receptor |
| <i>FZD2</i>   | frizzled class receptor 2             | 1             | 23           | 23                    | Up       | Plasma Membrane     | G-protein coupled receptor |
| <i>GLI2</i>   | GLI family zinc finger 2              | 1             | 25           | 25                    | Up       | Nucleus             | transcription regulator    |
| <i>GLIS1</i>  | GLIS family zinc finger 1             | 1             | 30           | 30                    | Up       | Nucleus             | transcription regulator    |
| <i>HHIP</i>   | hedgehog interacting protein          | 13            | 1            | -13                   | Up       | Plasma Membrane     | other                      |
| <i>KIF7</i>   | kinesin family member 7               | 2             | 20           | 10                    | Up       | Extracellular Space | other                      |
| <i>PTCH2</i>  | patched 2                             | 3             | 44           | 15                    |          | Plasma Membrane     | transmembrane receptor     |
| <i>WNT10B</i> | Wnt family member 10B                 | 28            | 1            | -28                   | Up       | Extracellular Space | other                      |
| <i>WNT3A</i>  | Wnt family member 3A                  | 1             | 44           | 44                    | Up       | Extracellular Space | cytokine                   |
| <i>WNT5A</i>  | Wnt family member 5A                  | 3             | 56           | 19                    | Up       | Extracellular Space | cytokine                   |
| <i>WNT7A</i>  | Wnt family member 7A                  | 10            | 1            | -10                   | Up       | Extracellular Space | cytokine                   |

**Table S3.** Expression of IGF2, IGF1R and INSR in first relapse compared to normal brain.

| Symbol       | Entrez Gene Name                         | TPM<br>normal | TPM tumor | Exp Fold<br>Change |
|--------------|------------------------------------------|---------------|-----------|--------------------|
| <i>IGF2</i>  | insulin like growth factor<br>2          | 6             | 1442      | 240                |
| <i>IGF1</i>  | insulin like growth factor<br>1          | 4             | 2         | -2                 |
| <i>IGF1R</i> | insulin-like growth factor<br>1 receptor | 11            | 3         | -4                 |
| <i>INSR</i>  | insulin like growth factor<br>2          | 13            | 34        | 3                  |
