# Supplementary material for: Ceritinib-Induced Regression of an Insulin-Like Growth Factor-Driven Neuroepithelial Brain Tumor
Source: MDPI journal article supplement (doi:10.3390/ijms20174267), 2019-08-30
Supplement: s1 [file s1]

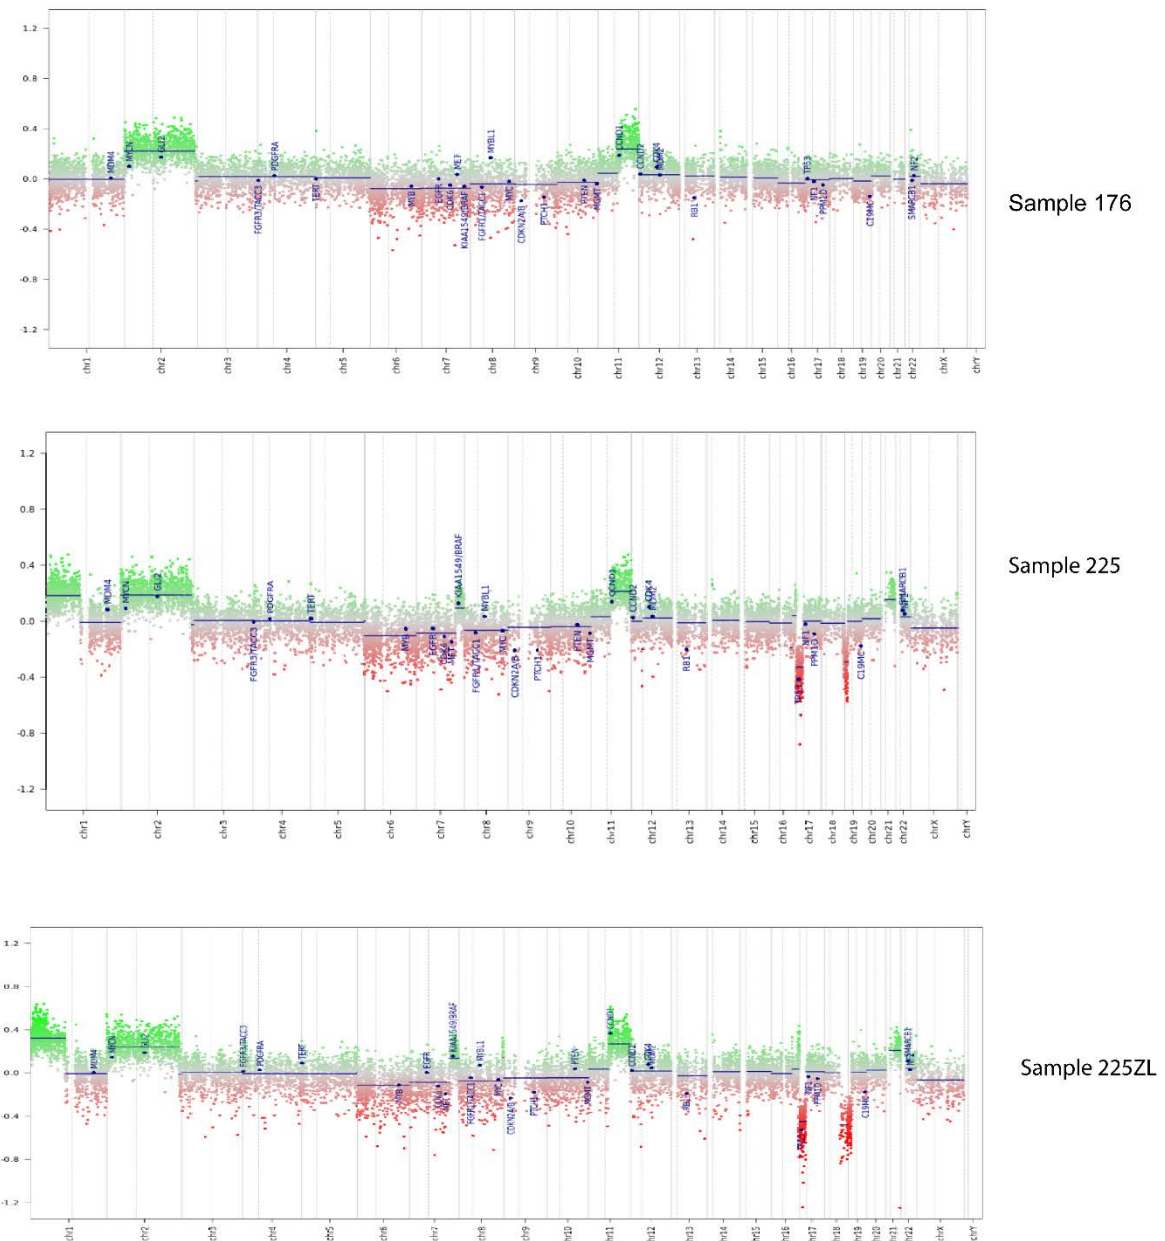

**Figure S2. DNA copy-number alterations.** Copy-number alterations of the primary tumor (176) the recurrence (225) and the primary tumor cells (225ZL) were analyzed using the EPIC 850k DNA methylome bead array.
